# Supplementary material
Source: Research Square preprint supplement (doi:10.21203/rs.3.rs-9407249/v1)
Supplement: Supplementary file 1 [file 9653e6e5bda684fb3677081f.docx]

**Appendix Table: Summary of performance-based measures from different mobility protocols**

| **Performance-based measures** | **Protocol variations** | **Number of participants** | **Median [IQR]** |
| --- | --- | --- | --- |
| TUG |  |  |  |
|  | TUG – fast (time, s) | 113 | 7.5 [6.8–8.6] |
|  | TUG – normal (time, s) | 147 | 10.3 [9.2–11.1] |
|  | TUG – cognitive 1-task (time, s) | 147 | 9.9 [8.9–11.3] |
|  | TUG – cognitive 3-task (time, s) | 147 | 10.8 [9.1–12.4] |
| Chair rise tests | |  |  |
|  | Chair rise – allow using arms (time, s) | 143 | 10.5 [9.1–12.2] |
|  | Chair rise – without arms (time, s) | 144 | 12.0 [9.5–14.2] |
| Gait speed |  |  |  |
|  | Gait speed – 4 m (time, m/s) | 147 | 0.84 [0.73, 0.93] |
|  | Gait speed – 3 m (time, m/s) | 147 | 0.91 [0.80, 1.01] |
| SLS |  |  |  |
|  | SLS – left leg (time, s) | 141 | 20.9 [5.78–60.00] |
|  | SLS – right leg (time, s) | 141 | 19.0 [7.00–60.00] |
|  | SLS – max both legs (time, s) | 141 | 28.3 [9.06–60.00] |
|  | SLS – preferred leg attempt 1 (time, s) | 142 | 11.7 [2.92–60.00] |
|  | SLS – preferred leg attempt 2( time, s) | 142 | 20.1 [4.53–60.00] |
|  | SLS – max preferred legs (time, s) | 142 | 27.5 [6.29–60.00] |

IQR= interquartile range; SLS= Single-Leg Stance; TUG= Timed Up and Go.
